# Supplementary material for: Consequences of aneuploidy in human fibroblasts with trisomy 21
Source: PubMed Central journal article supplement — Proc Natl Acad Sci U S A. 2021 Feb 1;118(6):e2014723118. doi: 10.1073/pnas.2014723118 (PMC8017964; doi:10.1073/pnas.2014723118), 2021-02-01
Supplement: pnas.2014723118.sapp.pdf [file pnas.2014723118.sapp.pdf]

Figure S1

A Primary fibroblasts utilized in this study (Coriell Institute Biobank)

| Cat#              | Nom   | Sex | Age  | Tissue |
|-------------------|-------|-----|------|--------|
| <b>Controls</b>   |       |     |      |        |
| GM08447           | Con.1 | F   | <1   | ear    |
| GM05659           | Con.2 | M   | 1    | chest  |
| GM00969           | Con.3 | F   | 2    | n.d.   |
| GM02036           | Con.4 | F   | 11   | n.d.   |
| GM03377           | Con.5 | M   | 19   | arm    |
| GM03440           | Con.6 | M   | 20   | leg    |
| <b>Trisomy 13</b> |       |     |      |        |
| GM00526           | T13.1 | M   | n.d. |        |
| GM02948           | T13.2 | M   | n.d. |        |
| <b>Trisomy 18</b> |       |     |      |        |
| GM00734           | T18.1 | F   | 18FW |        |
| GM03538           | T18.2 | F   | n.d. |        |
| <b>Trisomy 21</b> |       |     |      |        |
| GM04616           | T21.1 | F   | <1   | n.d.   |
| GM04592           | T21.2 | F   |      |        |
| AG05397           | T21.3 | M   | 1    | thorax |
| AG06922           | T21.4 | M   | 2    | thorax |
| GM02767           | T21.5 | F   | 14   | n.d.   |
| AG08941           | T21.6 | F   | 19   | arm    |
| AG08942           | T21.7 | M   | 21   | arm    |

B Average gene expression per chromosome (log<sub>2</sub> ratios)

| Chr | # genes | T13.1 | T13.2 | T18.1 | T18.2 | T21.1 | T21.2 | T21.3 | T21.4 | T21.5 | T21.6 | T21.7 | Con.1 | Con.2 | Con.3 | Con.4 | Con.5 | Con.6 |
|-----|---------|-------|-------|-------|-------|-------|-------|-------|-------|-------|-------|-------|-------|-------|-------|-------|-------|-------|
| 1   | 1103    | -0.02 | 0.00  | 0.00  | 0.00  | 0.00  | -0.02 | -0.01 | 0.00  | 0.01  | -0.01 | -0.01 | 0.01  | 0.00  | 0.00  | 0.00  | 0.00  | 0.00  |
| 2   | 712     | 0.01  | -0.04 | -0.01 | -0.02 | -0.04 | -0.02 | 0.00  | -0.02 | -0.03 | -0.02 | 0.02  | -0.04 | -0.03 | 0.01  | 0.01  | 0.02  | 0.00  |
| 3   | 608     | -0.01 | -0.05 | 0.01  | 0.00  | -0.03 | -0.03 | 0.00  | -0.04 | -0.02 | 0.03  | 0.03  | 0.00  | 0.01  | 0.01  | 0.00  | 0.00  | -0.02 |
| 4   | 381     | 0.00  | 0.04  | 0.01  | -0.01 | 0.02  | 0.03  | 0.01  | -0.01 | -0.01 | 0.01  | 0.02  | -0.02 | -0.04 | -0.02 | -0.03 | 0.05  | 0.00  |
| 5   | 488     | 0.00  | 0.04  | 0.03  | -0.01 | 0.01  | 0.03  | -0.01 | -0.02 | -0.05 | -0.02 | 0.02  | -0.03 | 0.02  | 0.00  | -0.02 | 0.02  | -0.03 |
| 6   | 549     | -0.04 | -0.03 | 0.00  | -0.02 | -0.03 | -0.08 | -0.04 | -0.05 | -0.05 | -0.04 | -0.02 | -0.04 | 0.02  | -0.02 | -0.03 | 0.02  | 0.01  |
| 7   | 482     | 0.03  | 0.03  | 0.02  | 0.02  | 0.04  | 0.01  | 0.01  | 0.02  | 0.03  | 0.01  | 0.02  | 0.01  | -0.01 | -0.02 | -0.02 | 0.00  | 0.00  |
| 8   | 379     | -0.05 | -0.08 | -0.09 | -0.02 | -0.02 | -0.02 | 0.00  | 0.00  | 0.01  | 0.00  | 0.00  | 0.01  | -0.06 | 0.00  | 0.01  | -0.02 | 0.01  |
| 9   | 438     | -0.06 | -0.05 | -0.03 | -0.05 | 0.00  | 0.04  | 0.01  | -0.01 | 0.02  | 0.02  | -0.01 | 0.05  | -0.05 | 0.02  | 0.03  | -0.04 | 0.00  |
| 10  | 421     | -0.03 | -0.07 | -0.04 | -0.04 | -0.04 | 0.01  | -0.02 | -0.02 | -0.03 | -0.04 | 0.02  | -0.04 | 0.04  | -0.04 | -0.03 | 0.04  | -0.03 |
| 11  | 628     | -0.03 | 0.01  | -0.01 | 0.01  | -0.01 | 0.00  | -0.02 | 0.03  | -0.01 | -0.01 | -0.04 | 0.02  | -0.02 | 0.00  | 0.02  | -0.02 | -0.01 |
| 12  | 565     | 0.00  | 0.01  | 0.01  | 0.01  | -0.01 | -0.03 | 0.00  | -0.03 | -0.03 | -0.07 | -0.01 | -0.02 | 0.01  | 0.00  | -0.03 | 0.01  | 0.03  |
| 13  | 183     | 0.59  | 0.60  | 0.06  | 0.00  | -0.01 | 0.00  | 0.01  | -0.06 | 0.05  | -0.03 | 0.06  | -0.08 | -0.02 | 0.00  | -0.02 | 0.04  | -0.01 |
| 14  | 364     | 0.00  | -0.01 | 0.01  | 0.02  | 0.00  | 0.02  | 0.04  | 0.01  | -0.01 | 0.01  | 0.04  | 0.00  | 0.02  | 0.02  | 0.00  | -0.01 | -0.01 |
| 15  | 343     | -0.01 | 0.02  | -0.01 | -0.03 | -0.03 | 0.02  | 0.01  | 0.00  | -0.02 | 0.02  | 0.01  | 0.01  | 0.00  | 0.00  | -0.03 | 0.03  | -0.02 |
| 16  | 489     | 0.01  | 0.04  | 0.01  | 0.03  | 0.05  | 0.05  | 0.01  | 0.04  | 0.03  | 0.03  | 0.00  | 0.04  | 0.02  | 0.02  | 0.03  | -0.03 | 0.03  |
| 17  | 643     | 0.03  | 0.01  | -0.04 | -0.02 | 0.03  | 0.02  | 0.00  | 0.02  | 0.03  | 0.01  | -0.02 | 0.03  | -0.02 | 0.01  | 0.02  | -0.03 | 0.02  |
| 18  | 145     | 0.00  | 0.05  | 0.61  | 0.65  | 0.03  | 0.06  | 0.03  | 0.03  | 0.04  | 0.02  | 0.04  | 0.00  | -0.03 | 0.03  | -0.02 | -0.04 | 0.04  |
| 19  | 790     | -0.01 | -0.02 | -0.02 | -0.03 | -0.02 | -0.03 | -0.02 | 0.02  | -0.02 | -0.02 | -0.07 | 0.01  | 0.03  | 0.01  | 0.02  | -0.01 | 0.02  |
| 20  | 293     | -0.02 | -0.01 | -0.02 | 0.01  | -0.01 | 0.01  | -0.01 | 0.00  | -0.03 | 0.02  | -0.01 | 0.06  | -0.01 | 0.00  | 0.02  | -0.03 | 0.00  |
| 21  | 92      | 0.02  | 0.00  | 0.09  | 0.05  | 0.58  | 0.51  | 0.58  | 0.58  | 0.63  | 0.52  | 0.52  | -0.07 | 0.05  | 0.00  | 0.02  | 0.01  | -0.01 |
| 22  | 256     | -0.10 | -0.09 | -0.11 | -0.05 | -0.05 | 0.00  | -0.03 | 0.02  | -0.01 | 0.04  | -0.02 | 0.04  | 0.01  | -0.03 | 0.03  | 0.00  | 0.00  |
| X   | 349     | 0.03  | 0.00  | 0.02  | -0.01 | 0.01  | -0.05 | -0.06 | -0.06 | 0.05  | 0.01  | -0.03 | -0.01 | 0.07  | -0.01 | 0.02  | 0.00  | -0.04 |

C Outliers genes from normal distributions

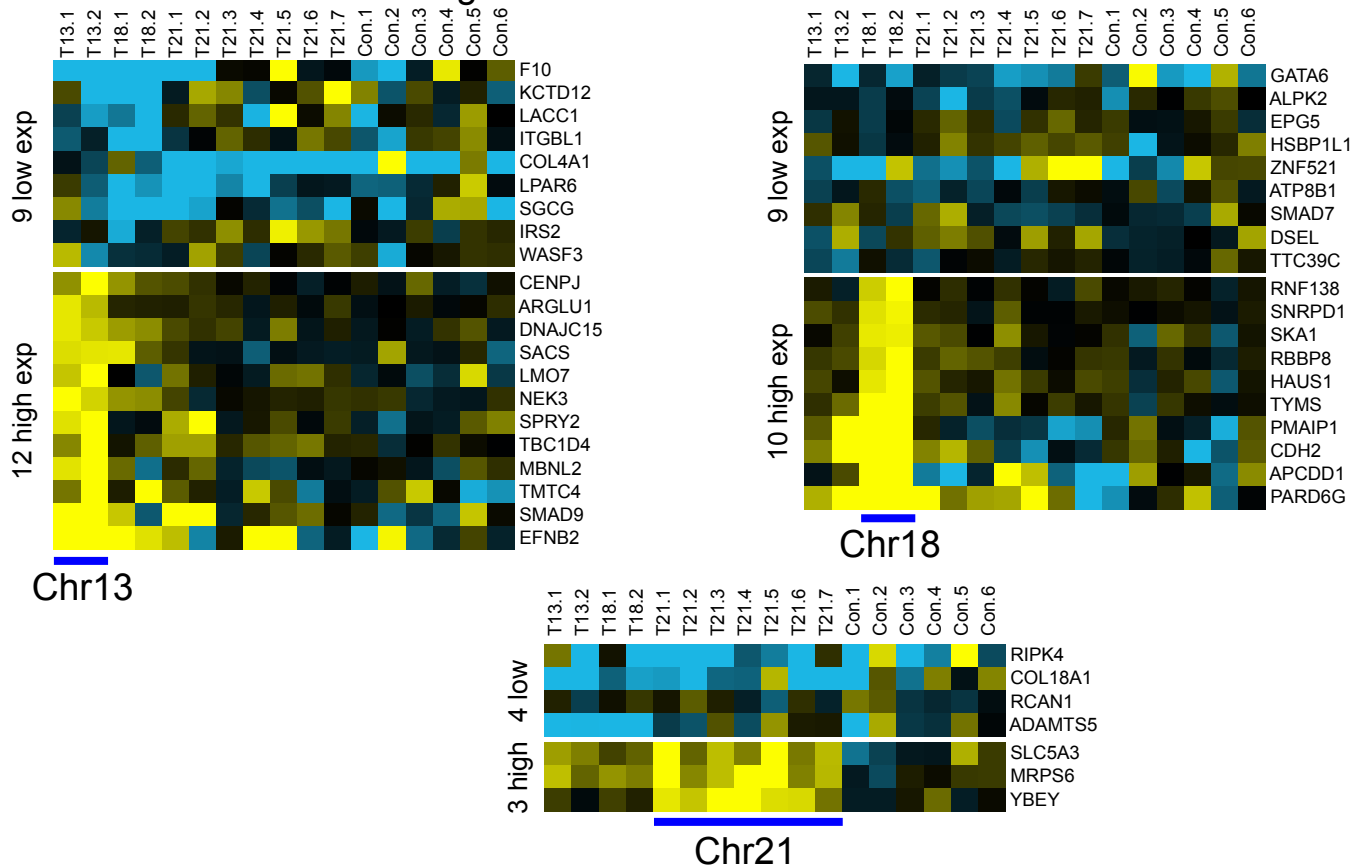

**Figure S1. Transcript levels increase proportionally with gene copy number in trisomic primary fibroblasts**

Cell lines utilized in this study. All cell lines were obtained from the Coriell Institute (<https://www.coriell.org>). Cat# = Catalogue number, Nom = nomenclature used in the manuscript. Sex, age, and tissue of the donor are listed. **B.** The values of the averaged gene expression per chromosome calculated for each cell line are shown. The triplicated chromosomes are highlighted in red. **C.** Gene expression of triplicated genes that are outliers in the fits of the normal distributions for each trisomic cell lines is shown. Outliers were identified by fitting the distributions to a Gaussian curve using least squares regression methods and defining the points above or below the curve.

# Figure S2

## A

| Fibroblasts immortalized with hTERT<br>RNASeq data from Sullivan et al. |              |              | T cells were isolated from<br>10 individuals with T21 and<br>7 controls |        | Monocytes were isolated from<br>10 individuals with T21 and<br>7 controls |        | EBV immortalized lymphoblastoid<br>lines three T21 and three D21 come<br>from the Nexus Clinical Data Registry<br>and Biobank at the University of Colorado |        |
|-------------------------------------------------------------------------|--------------|--------------|-------------------------------------------------------------------------|--------|---------------------------------------------------------------------------|--------|-------------------------------------------------------------------------------------------------------------------------------------------------------------|--------|
| Cat#                                                                    | Nomenclature | Sullivan     | Sullivan                                                                | Nom    | Sullivan                                                                  | Nom    | Sullivan                                                                                                                                                    | Nom    |
| Controls                                                                |              |              |                                                                         |        |                                                                           |        |                                                                                                                                                             |        |
| GM08447                                                                 | Con.1a-b     | DS_F2DA_1-2  | D21_F17YR                                                               | Con.1  | D21_F17YR_5112016                                                         | Con.1  | Sullivan                                                                                                                                                    | Nom    |
| GM05659                                                                 | Con.2a-b     | DS_M1YR_1-2  | D21_F22YR                                                               | Con.2  | D21_F29YR_5112016                                                         | Con.2  | D21_F7YR_1A                                                                                                                                                 | Con.1a |
| GM00969                                                                 | Con.3a-b     | DS_F2YR_1-2  | D21_F29YR                                                               | Con.3  | D21_M31YR_5112016                                                         | Con.3  | D21_F7YR_2A                                                                                                                                                 | Con.1b |
| GM02036                                                                 | Con.4a-b     | DS_F11YR_1-2 | D21_F31YR                                                               | Con.4  | D21_M38YR_5112016                                                         | Con.4  | D21_F14YR_1B                                                                                                                                                | Con.2a |
| GM03377                                                                 | Con.5a-b     | DS_M19YR_1-2 | D21_M31YR                                                               | Con.5  | D21_F22YR_5312016                                                         | Con.5  | D21_F14YR_2B                                                                                                                                                | Con.2b |
| GM03440                                                                 | Con.6a-b     | DS_M20YR_1-2 | D21_M38YRA                                                              | Con.6  | D21_F31YR_5312016                                                         | Con.6  | D21_F18YR_1C                                                                                                                                                | Con.3a |
| Trisomy 21                                                              |              |              | D21_M38YRB                                                              | Con.7  | D21_M38YR_5312016                                                         | Con.7  | D21_F18YR_2C                                                                                                                                                | Con.3b |
| GM04616                                                                 | T21.1a-b     | TS_F3DA_1-2  | T21_F32YR                                                               | T21.1  | T21_F32YR_5112016                                                         | T21.1  | T21_F9YR_1A                                                                                                                                                 | T21.1a |
| AG05397                                                                 | T21.2a-b     | TS_M1YR_1-2  | T21_F45YR                                                               | T21.2  | T21_F45YR_5112016                                                         | T21.2  | T21_F9YR_2A                                                                                                                                                 | T21.1b |
| AG06922                                                                 | T21.3a-b     | TS_M2YR_1-2  | T21_F4YR                                                                | T21.3  | T21_M13YRA_5112016                                                        | T21.3  | T21_F13YR_1B                                                                                                                                                | T21.2a |
| GM02767                                                                 | T21.4a-b     | TS_F14YR_1-2 | T21_M12YR                                                               | T21.4  | T21_M13YRB_5112016                                                        | T21.4  | T21_F13YR_2B                                                                                                                                                | T21.2b |
| AG08941                                                                 | T21.5a-b     | TS_F19YR_1-2 | T21_M13YR                                                               | T21.5  | T21_F4YR_5312016                                                          | T21.5  | T21_F20YR_1C                                                                                                                                                | T21.3a |
| AG08942                                                                 | T21.6a-b     | TS_M21YR_1-2 | T21_M13YRA                                                              | T21.6  | T21_M1YR_5312016                                                          | T21.6  | T21_F20YR_2C                                                                                                                                                | T21.3b |
|                                                                         |              |              | T21_M13YRB                                                              | T21.7  | T21_M12YR_5312016                                                         | T21.7  |                                                                                                                                                             |        |
|                                                                         |              |              | T21_M14YR                                                               | T21.8  | T21_M13YR_5312016                                                         | T21.8  |                                                                                                                                                             |        |
|                                                                         |              |              | T21_M1YR                                                                | T21.9  | T21_M14YR_5312016                                                         | T21.9  |                                                                                                                                                             |        |
|                                                                         |              |              | T21_M33YR                                                               | T21.10 | T21_M33YR_5312016                                                         | T21.10 |                                                                                                                                                             |        |

## B

| Letau.   | Nom   | Replicates from Monozygotic twins |          |
|----------|-------|-----------------------------------|----------|
| Letau.   | Nom   | Letau.                            | Nom      |
| rpkm_Ts1 | T21.1 | rpkm_T2N_Rep0                     | MZ.1     |
| rpkm_Ts2 | T21.2 | rpkm_T2N_Rep1                     | MZ.2     |
| rpkm_Ts3 | T21.3 | rpkm_T2N_Rep2                     | MZ.3     |
| rpkm_Ts4 | T21.4 | rpkm_T2N_Rep3                     | MZ.4     |
| rpkm_Ts5 | T21.5 | rpkm_T1DS_Rep0                    | MZ.T21.1 |
| rpkm_Ts6 | T21.6 | rpkm_T1DS_Rep1                    | MZ.T21.2 |
| rpkm_Ts7 | T21.7 | rpkm_T1DS_Rep2                    | MZ.T21.3 |
| rpkm_Ts8 | T21.8 | rpkm_T1DS_Rep3                    | MZ.T21.4 |
| rpkm_N1  | Con.1 |                                   |          |
| rpkm_N2  | Con.2 |                                   |          |
| rpkm_N3  | Con.3 |                                   |          |
| rpkm_N4  | Con.4 |                                   |          |
| rpkm_N5  | Con.5 |                                   |          |
| rpkm_N6  | Con.6 |                                   |          |
| rpkm_N7  | Con.7 |                                   |          |
| rpkm_N8  | Con.8 |                                   |          |

## C

Genes outliers on Chr 21 in i-fibroblasts (Sullivan et al.)

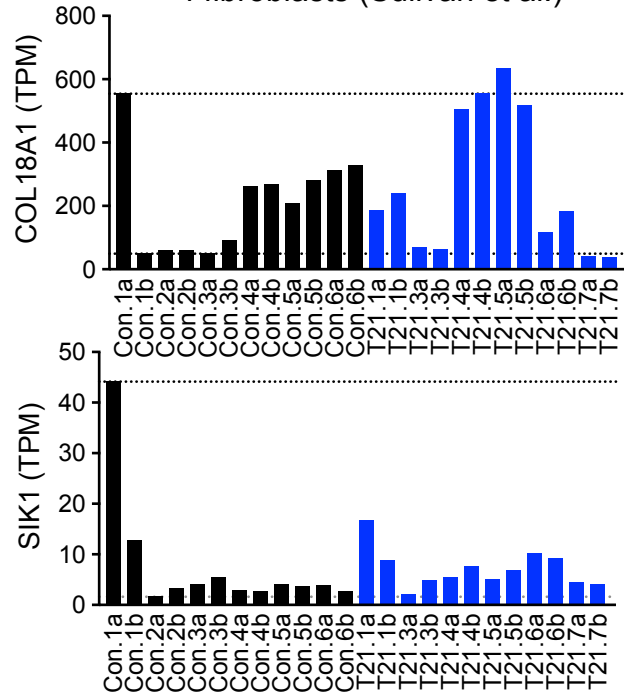

## D

Unrelated individuals

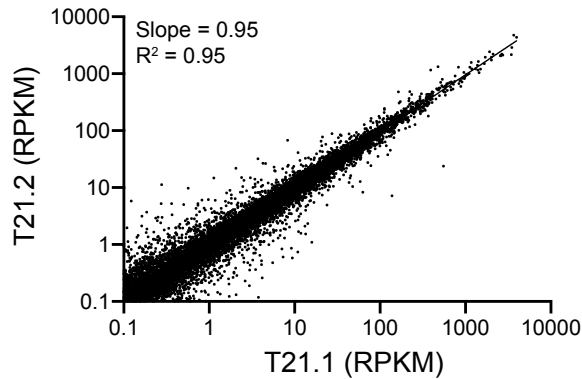

## E

Monozygotic sample -replicate

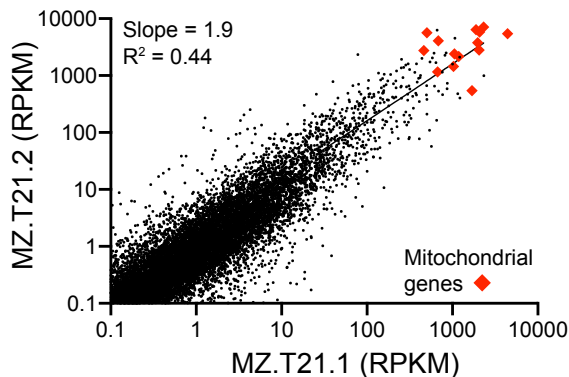

## F

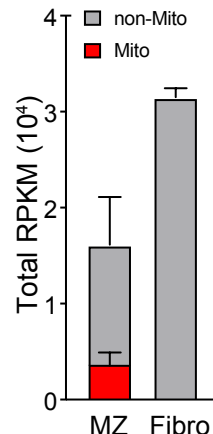

## G

ORFs > 1 RPKM

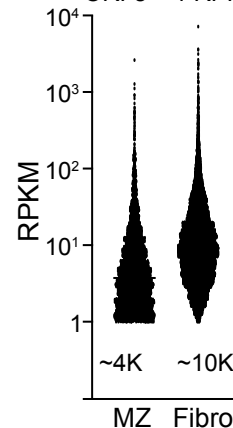

## H

Sullivan et al. Letau. et al.

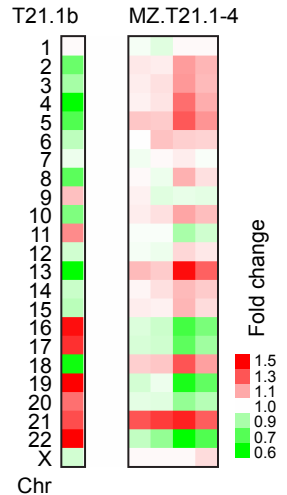

**Figure S2. Transcript levels increase proportionally with gene copy number in distinct trisomic cell lines**

**A.** Nomenclature of the cell lines analyzed by Sullivan et al. (20). **B.** Nomenclature of the cell lines analyzed by Letourneau et al. (16). **C.** Example of a couple of outliers of the fits of the distributions of triplicated genes in the data for the fibroblasts analyzed by Sullivan et al. **D.** Linear regression analysis of the RNA counts of the transcriptomes from two unrelated individuals. **E.** Linear regression analysis of the RNA counts of the biological replicates of the transcriptome from one monozygotic twin with trisomy 21. **F.** The average total reads of 8 transcriptomes from the monozygotic twins are almost half when compared to the average of the total reads from primary fibroblasts from unrelated individuals. In red, ~20% of the total reads come from mitochondrial DNA. **G.** Distribution of the transcript reads that show 1 RPKM of greater in both sets of data. **H.** Comparison of the average gene expression per chromosome of the outlier transcriptomes in the Sullivan et al. and Letourneau et al. studies.

**Figure S3**

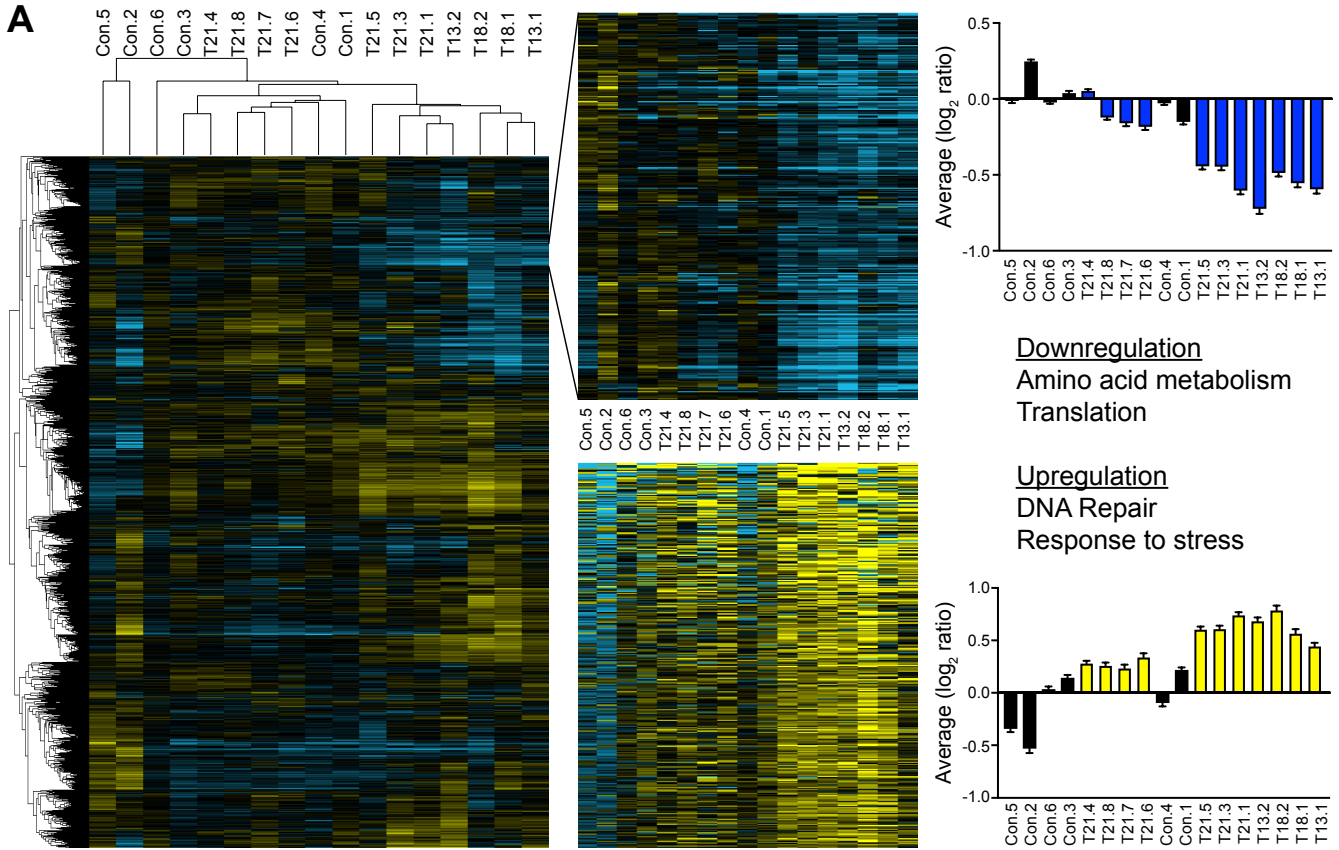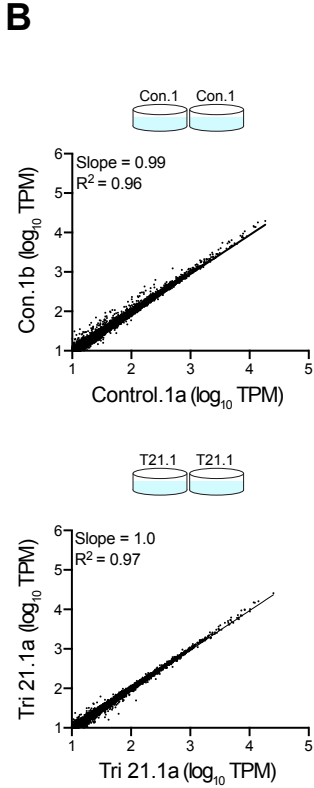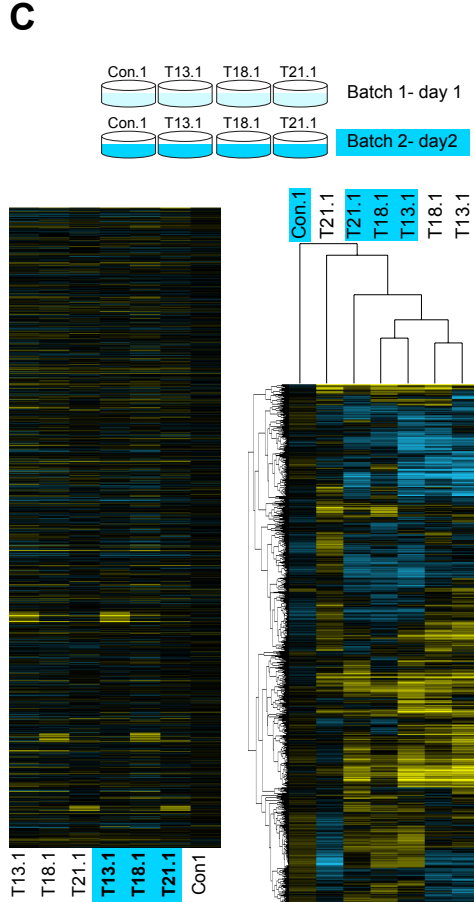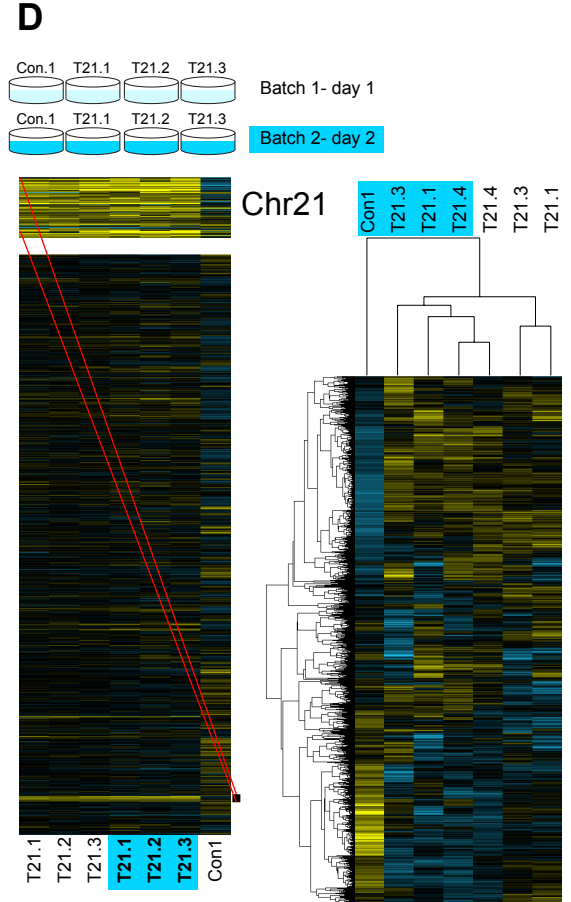

**Figure S3. Gene expression patterns of human primary fibroblasts**

**A.** Hierarchical clustering analyses of the expression patterns of primary fibroblasts analyzed in this study (left heatmap). Down (middle top) and upregulated (middle bottom) cluster of genes in primary trisomic fibroblasts. Bars represent the average change in gene expression of the down and unregulated clusters (right). **B.** Linear regression analysis of the transcriptome profiles of one control and one trisomy 21 cell lines grown in parallel show a high degree of reproducibility. **C-D.** Hierarchical clustering analyses of the expression patterns of primary fibroblasts grown months apart show that culture conditions significantly influence the patterns of gene expression. Cluster patterns are driven by the time of culture in each comparison (blue boxes).

## Figure S4

A

Pearson r between RNA and protein profiles

|           | T13.1.prot | T13.2.prot | T18.1.prot | T18.2.prot |
|-----------|------------|------------|------------|------------|
| Con.1.rna | -0.30      | -0.14      | -0.34      | -0.19      |
| Con.2.rna | 0.01       | -0.04      | -0.03      | 0.15       |
| T13.1.rna | 0.50       | 0.39       | 0.33       | 0.29       |
| T13.2.rna | 0.20       | 0.57       | 0.22       | 0.27       |
| T18.1.rna | 0.41       | 0.41       | 0.63       | 0.46       |
| T18.2.rna | 0.29       | 0.37       | 0.36       | 0.65       |
| T21.1.rna | 0.13       | 0.30       | 0.10       | 0.27       |
| T21.3.rna | -0.03      | -0.07      | -0.11      | 0.04       |
| T21.4.rna | 0.08       | 0.16       | 0.04       | 0.15       |

|           | Con.1a.prot | Con.1b.prot | Con.2.prot | Con.4.prot | Con.6.prot |
|-----------|-------------|-------------|------------|------------|------------|
| Con.1.rna | 0.41        | 0.42        | -0.44      | 0.09       | 0.00       |
| Con.2.rna | -0.16       | -0.18       | 0.49       | -0.01      | -0.03      |
| Con.4.rna | 0.20        | 0.22        | -0.23      | 0.55       | 0.17       |
| Con.6.rna | 0.07        | 0.09        | -0.29      | 0.07       | 0.42       |

|           | T21.1.prot | T21.2prot | T21.5prot | T21.6prot | T21.7prot |
|-----------|------------|-----------|-----------|-----------|-----------|
| T21.1.rna | 0.40       | 0.31      | 0.20      | 0.16      | 0.18      |
| T21.2.rna | 0.11       | 0.57      | 0.20      | 0.27      | 0.26      |
| T21.5.rna | 0.16       | 0.31      | 0.58      | 0.32      | 0.26      |
| T21.6.rna | 0.03       | 0.27      | 0.24      | 0.50      | 0.27      |
| T21.7.rna | -0.02      | 0.32      | 0.19      | 0.28      | 0.53      |

B

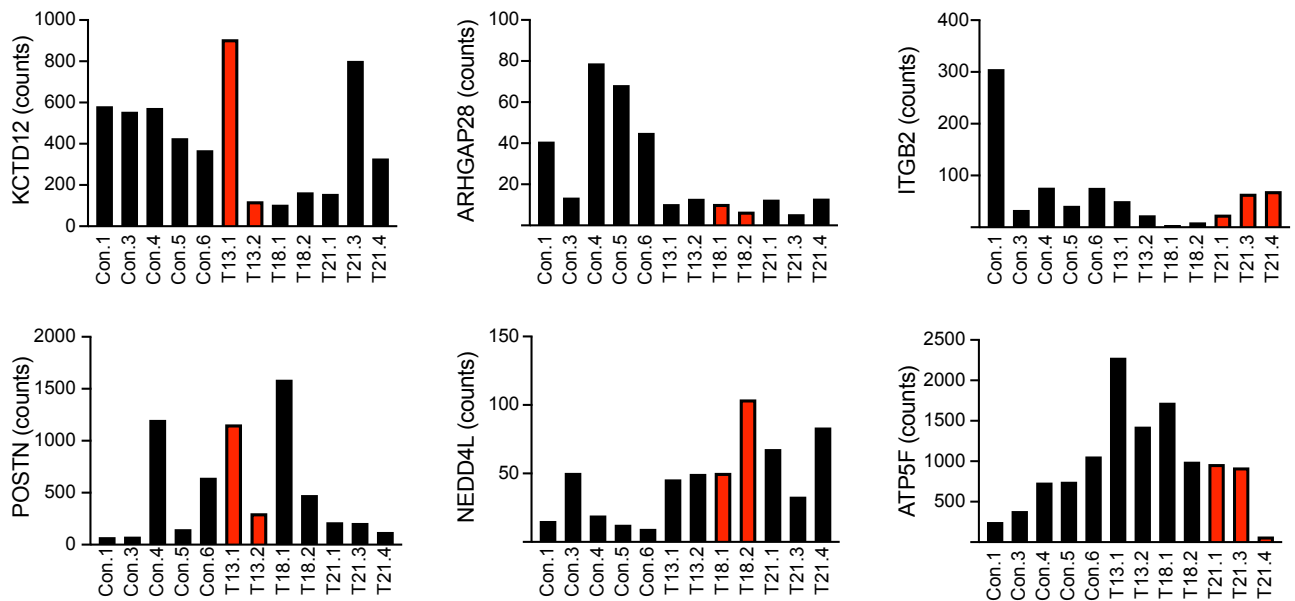

**Figure S4. Protein levels proportionally increase with copy number in trisomic fibroblasts**

**A.** Pearson correlation coefficients were calculated for the transcriptome and proteome profiles of the indicated cell lines. **B.** Examples of the peptide counts of a few triplicated genes that are outliers in the fits of the normal distributions. Red bars correspond to peptide counts of the triplicates genes.

## Figure S5

Downregulated Cluster (202 proteins)

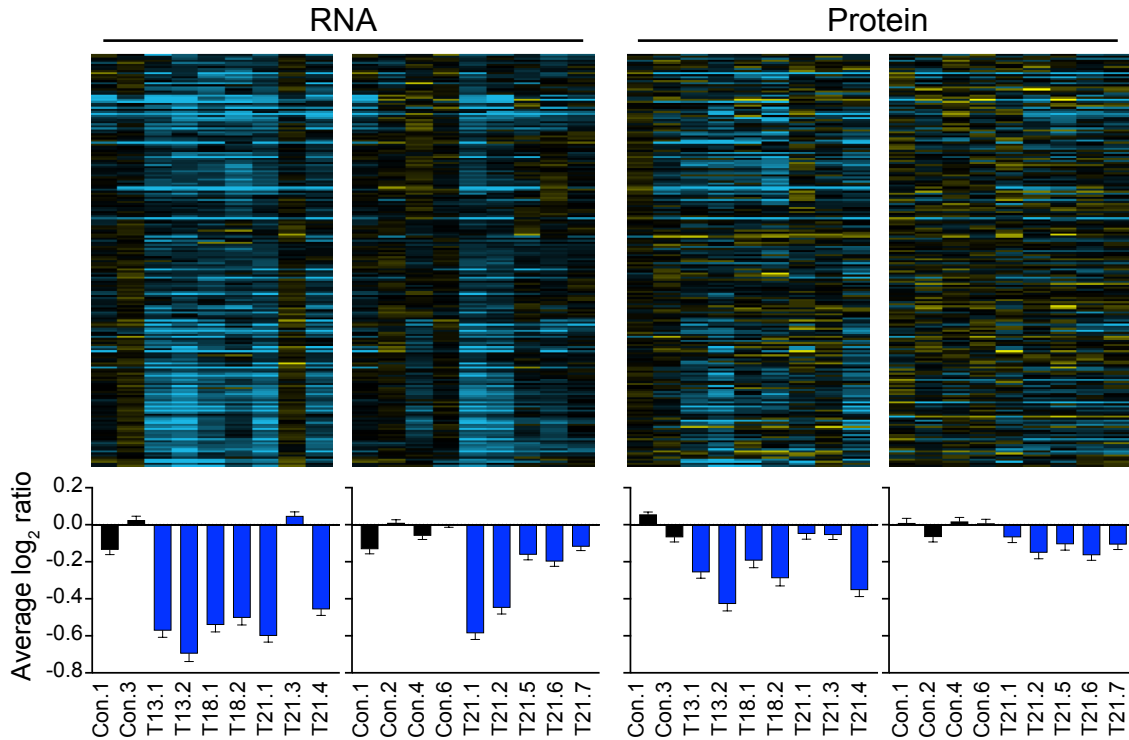

Upregulated Cluster (121 proteins)

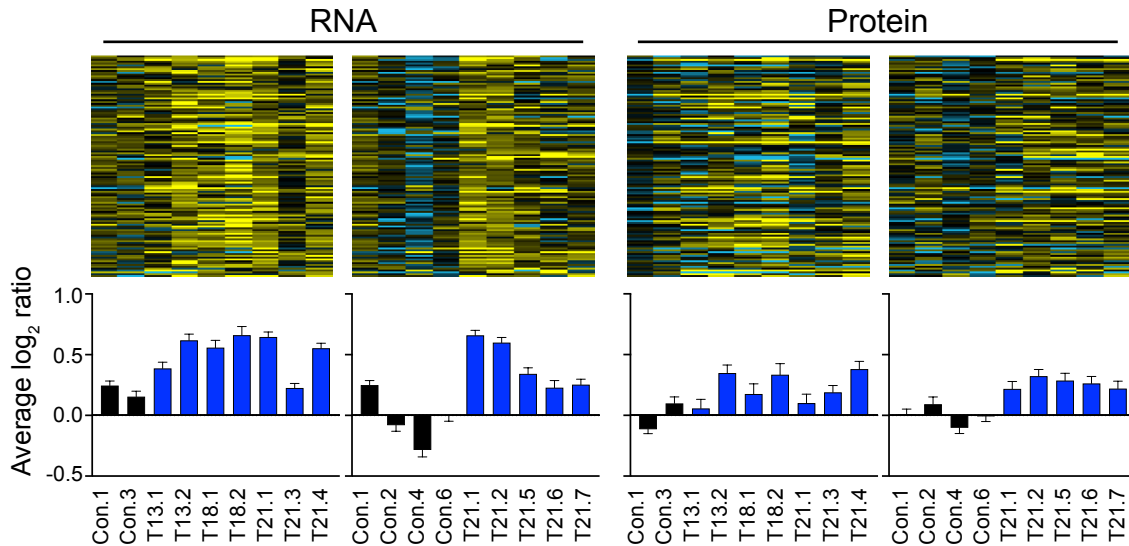

### Figure S5. Cluster of down and upregulated genes in trisomic fibroblasts

Down and upregulated clusters of genes identified in Figure S3 lead to changes in protein levels.

Bars represent average change in transcript (left) and protein levels (left) in each of the cell lines analyzed.



**Figure S6**

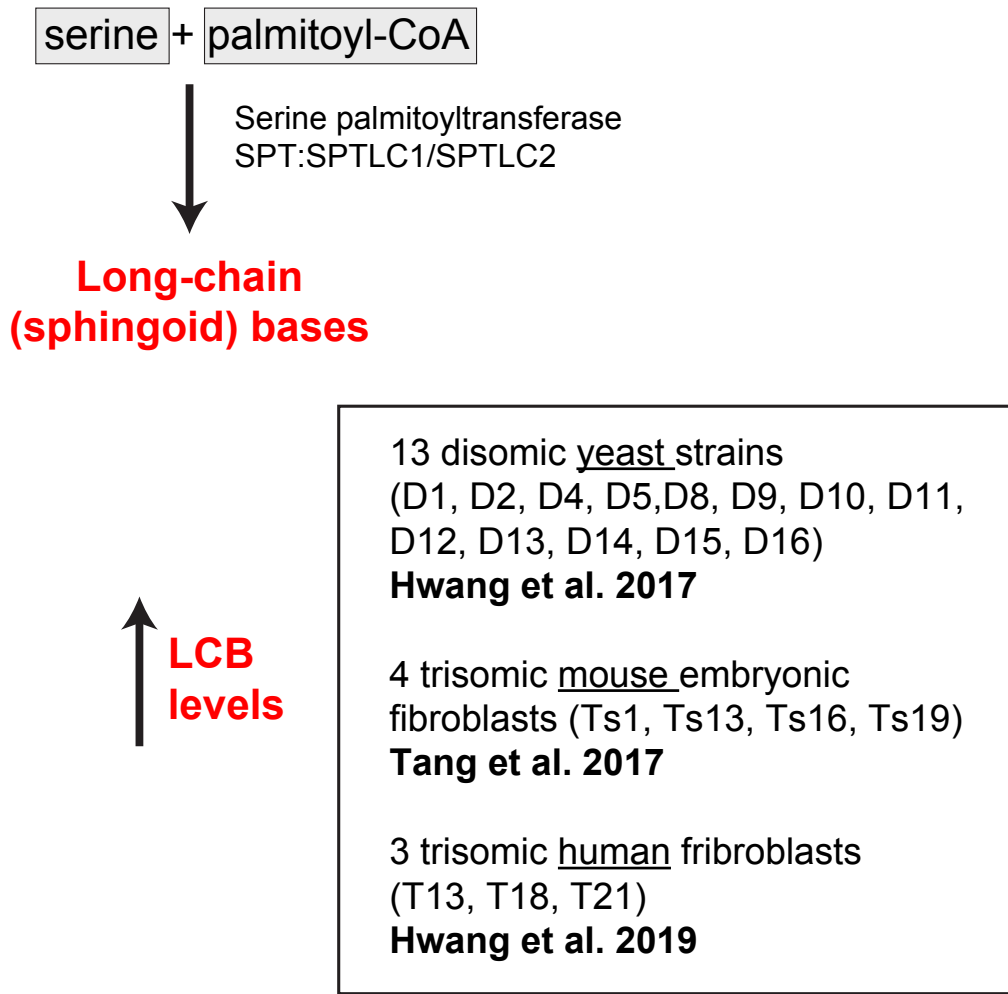

**Figure S6. Sphingolipid synthesis is upregulated in aneuploid cells**

Schematic of the biochemical pathway for the serine-dependent synthesis of sphingolipids is shown. LCB levels are elevated in aneuploid yeast, mouse, and human cells independent of the identity of the extra chromosome.

**Figure S7**

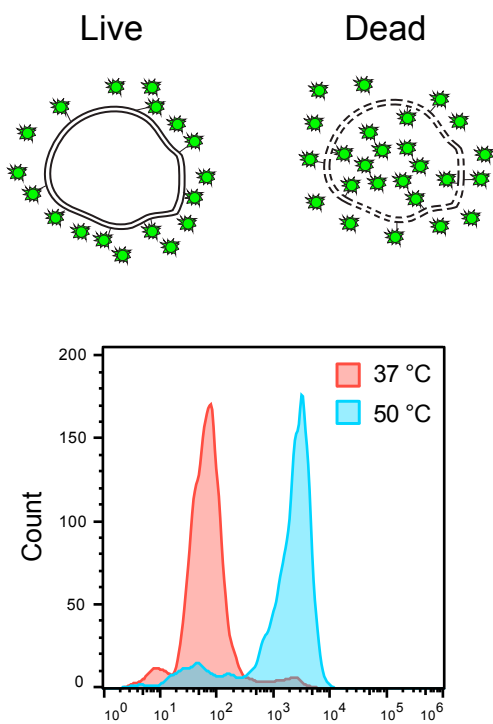

**Figure S7. Assay for cell viability**

The LIVE/DEAD™ Fixable Green Dead Cell Stain Kit uses a dye that reacts with free amines yielding intense fluorescent staining. The dye's reactivity is restricted to the cell surface in viable cells resulting in less intense fluorescence than non-viable cells. As a control experiment, cells were heat shocked for 30 minutes. Viable control cells are in red and heat treated non-viable cells are in blue.

## **Supplementary Experimental Procedures**

### **Protein extraction and digestion**

Frozen cell pellets were lysed with RIPA buffer (150 mM NaCl, 1% NP40, sodium deoxycholate 0.5%, SDS 0.1%, TRIS-HCl 25 mM pH 7.4, DTT 5 mM) and insoluble material was removed by pelleting at 20k x g for 10 min. The supernatant was methanol/chloroform precipitated and dried on the benchtop. Dry peptide pellets were resuspended in 8 M urea, 50 mM ammonium bicarbonate (ambic). Protein concentrations were measured using the DC protein assay kit (BioRad). Proteins were reduced by adding DTT to a final concentration of 5 mM and incubating for 30 min at RT, then alkylated with 15 mM iodoacetamide in the dark at RT for 30 min. An additional 5 mM DTT was added to quench the iodoacetamide. The urea concentration was diluted to 2 M by adding 3 volumes of 50 mM ambic. Proteins were digested overnight at room temperature with lysyl endopeptidase (lysC, Wako, Richmond, VA) at a ratio 1:125 enzyme:protein at RT. Samples were diluted to 1 M urea with 50 mM ambic and digested with Trypsin (Promega #V5111) for 10 hours at 1:125 enzyme:protein at 37°C. Digestion was stopped by the addition of formic acid (FA) to a final concentration of 2%. Acidified peptides were loaded onto pre-equilibrated Sep-Pak tC18 cartridges (Waters) and the columns were washed with 1% FA. Bound peptides were eluted with 70% acetonitrile (ACN), 1% FA, dried, and re-suspended in water. Protein concentration was measured using the Pierce colorimetric peptide assay (Thermo, #23275). 50 µg of peptides from each sample was aliquoted and dried down, then re-suspended in 100 µl of 0.5 M HEPES, pH = 8.5. Peptides were labeled by the addition of 0.25 mg TMT in anhydrous ACN for 60 min at RT. Labeling was quenched with 8 µl 5% hydroxylamine and acidified with 16 µl neat FA. A small aliquot (5 µl) of each labeled sample was removed and mixed in equal volumes from each of the 10 channels within each TMT set, desalted on C18 STAGE tips (55), and analyzed using a 85 min LC-MS/MS/MS method with synchronous precursor selection (SPS) enabled to generate TMT reporter ions from MS2 fragment ions. Reporter ions were scanned at 60,000 resolution in the orbitrap. The final sample mixes for each 10plex were made based on the relative intensity of total reporter ions from each in order to achieve equal levels.

### **Peptide Fractionation**

Combined TMT-labeled peptides were de-salted, resuspended in 300  $\mu$ l buffer A (5% ACN, 10 mM  $\text{NH}_4\text{HCO}_3$ , pH 8) and separated by high-pH reverse-phase HPLC (56) on a C18 column (Waters, #186003570, 4.6 mm x 250 mm, 3.5  $\mu$  ID) using a 50 min gradient from 18% to 38% buffer B (90% ACN, 10 mM  $\text{NH}_4\text{HCO}_3$ , pH 8) with a flow rate = 0.8 ml/min. Fractions were collected over 45 min at 28 sec intervals beginning 5 min after the start of gradient in a 96-well plate. These original fractions were pooled into 12 samples each containing four fractions (only 48 of 96 fractions were used) by sampling at equal intervals across the gradient, i.e. by combining fractions 1/25/49/73, 3/27/51/75, 5/29/53/77, ....13,37,61,95. This pooling strategy minimizes overlap between fractions. The pooled samples were dried down, resuspended in 50  $\mu$ l of 5% FA, and desalted on STAGE tips.

### **LC-MS/MS Analysis**

Each fraction was analyzed on a Thermo Orbitrap Fusion mass spectrometer (Thermo Fisher Scientific) equipped with an Easy nLC-1000 UHPLC (Thermo Fisher Scientific). Peptides were separated with a gradient of 6–25% ACN in 0.1% FA over 115 min and introduced into the mass spectrometer by nano-electrospray as they eluted off a self-packed 40 cm, 75  $\mu$ m (ID) reverse-phase column packed with 1.8  $\mu$ m, C18 resin (Sepax Technologies, Newark, DE). They were detected using the real-time search (RTS) MS3 method (57) which employs a data-dependent Top10-MS2 method and a RTS triggered SPS-MS3 to collect reporter ions. For each cycle, one full MS scan was acquired in the Orbitrap at a resolution of 120,000 with automatic gain control (AGC) target of  $5 \times 10^5$  and maximum ion accumulation time of 100 ms. Each full scan was followed by the individual selection of the most intense ions, using a 2 sec cycle time for collision-induced dissociation (CID) and MS2 analysis in the linear ion trap for peptide identification using an AGC target of  $1.5 \times 10^4$  and a maximum ion accumulation time of 50 ms. Ions selected for MS2 analysis were excluded from reanalysis for 60 s. Ions with +1, >+5, or unassigned charge were excluded from selection. Collected MS2 spectra were searched in real time against a database of all uniprot reviewed human sequences (uniprot.org, downloaded May 1, 2019) using binomial score cutoff of 0.75. Passing spectra triggered synchronous precursor selection of up to 10 MS2 ions for HCD fragmentation and MS3 scanning in the orbitrap at resolution = 60,000 using a maximum ion time of 200 ms. The gene close-out feature was enabled and applied to each set of

12 fractions and used to limit the selection and collection of MS3 reporter ions to a maximum of 10 peptides per protein across all 12 runs in each 10plex set.

### **Peptide Searching and Filtering and Protein Quantification**

MS/MS spectra were then searched to match peptide sequences using SEQUEST v.28 (58) and a composite database containing all reviewed human uniprot protein sequences (uniprot.org, downloaded May 1, 2019) and their reversed complement. Search parameters allowed for two missed cleavages, a mass tolerance of 20 ppm, a static modification of 57.02146 Da (carboxyamidomethylation) on cysteine, and dynamic modifications of 15.99491 Da (oxidation) on methionine and 229.16293 Da on peptide amino termini and lysines.

Peptide spectral matches were filtered to a 2% false-positive rate using the target-decoy strategy (59) combined with linear discriminant analysis (LDA)(60) using the SEQUEST Xcorr and  $\Delta C_n$  scores, mass error, charge, and the number of missed cleavages. Further filtering based on the quality of quantitative measurements (reporter ion sum signal-to-noise  $\geq 200$ , isolation specificity  $>0.7$ ) resulted in a final protein FDR  $< 1\%$  for both 10plex experiments.

Total protein intensity values for each sample were derived from the summed reporter ion intensities from the corresponding channel from all peptides mapping to that protein. Values were normalized to account for small variations in sample mixing based on the sum intensity of values from all proteins in each channel within each 10plex. Relative abundances for each protein across samples within each 10plex were calculated as the fraction of the total intensity derived from each channel. The average  $\log_2$  [Trisomy/WT] was calculated and used for all subsequent analysis. Proteome data is available: <https://massive.ucsd.edu>, ID#MSV000085706 and are available for download at <ftp://massive.ucsd.edu/MSV000085706>.
